# Supplementary material for: Efficient exon skipping of SGCG mutations mediated by phosphorodiamidate morpholino oligomers
Source: JCI journal article supplement (doi:10.1172/jci.insight.99357), 2018-05-02
Supplement: sd1 [file 1]

**SUPPLEMENTAL MATERIAL**

**Supplemental Table 1. Cell lines and AON dosing strategies**

| <b>Subject</b>      | <b>Mutation</b>                   | <b>Oligo treatment</b> | <b>AON Dosing</b>                                           |
|---------------------|-----------------------------------|------------------------|-------------------------------------------------------------|
| 521ΔT               | SGCG c.521-525<br>TTTTT>TTTT      | 2OMePS e4/e5/e6/e7     | Dose 1: 75/50/100/50 nM;<br>Dose 2: 150/100/200/100 nM      |
| Control             | No mutation                       | 2OMePS e4/e5/e6/e7     | Dose 1: 50/50/50/50 nM;<br>Dose 2: 100/100/100/100 nM       |
| 521ΔT               | SGCG c.521-525<br>TTTTT>TTTT      | Vivo-PMO e4/e5/e6/e7   | Dose 1: 1.0/0.5/1.5/0.5 μM;<br>Dose 2: 1.5/0.75/2.0/0.75 μM |
| Control             | No mutation                       | Vivo-PMO e4/e5/e6/e7   | Dose 1: 1.0/0.5/1.5/0.5 μM;<br>Dose 2: 1.5/0.75/2.0/0.75 μM |
| Ex5/6del<br>(e5/6d) | Deletion of SGCG<br>exons 5 and 6 | Vivo-PMO e4/e7         | Dose 1: 1.0/0.5 μM                                          |
| Ex6del (e6d) 1      | Deletion of SGCG<br>exon 6        | Vivo-PMO e4/e5/e7      | Dose 1: 1.0/0.5/0.5 μM                                      |
| Ex6del (e6d) 2      | Deletion of SGCG<br>exon 6        | Vivo-PMO e4/e5/e7      | Dose 1: 1.0/0.5/0.5 μM                                      |
| Ex7del (e7d)        | Deletion of SGCG<br>exon 7        | Vivo-PMO e4/e5/e6      | Dose 1: 1.0/0.5/1.5 μM                                      |

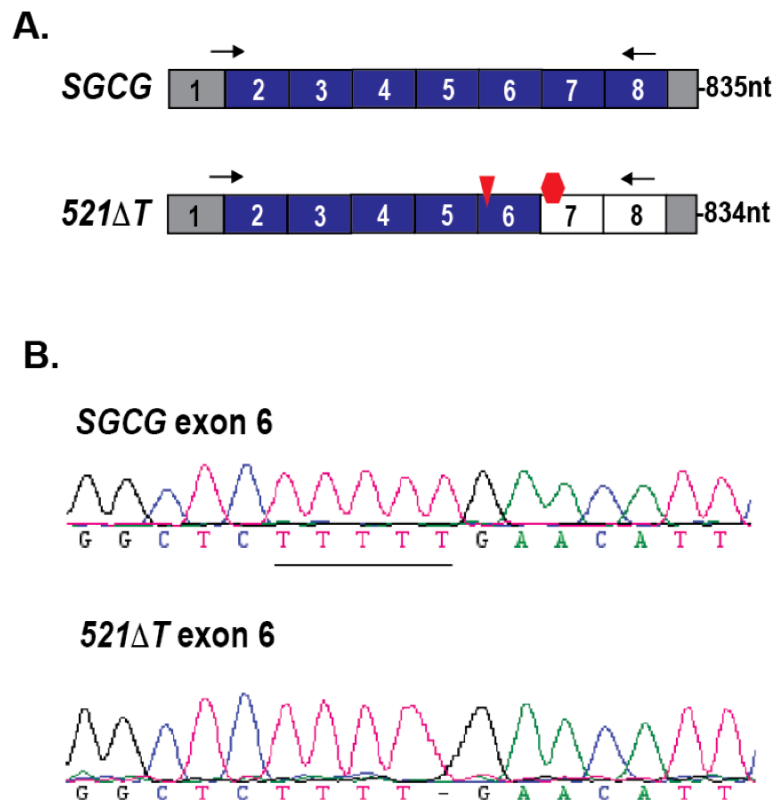

**Supplemental Figure 1. SGCG expression in reprogrammed fibroblasts. (A)** Schematic showing the exon organization of the SGCG control and 521 $\Delta$ T transcripts. A single thymine deletion in exon 6 (red triangle) results in the generation of a premature stop codon. Arrows denote the location of the PCR primers, and the length of the amplicons are indicated. **(B)** Sequence analysis of the control and 521 $\Delta$ T transcripts that were expressed in the reprogrammed fibroblasts. Shown is a portion of SGCG exon 6. The control sequence contains a stretch of 5 thymine residues, underlined. A deletion of a single thymine is observed in the 521 $\Delta$ T transcript.

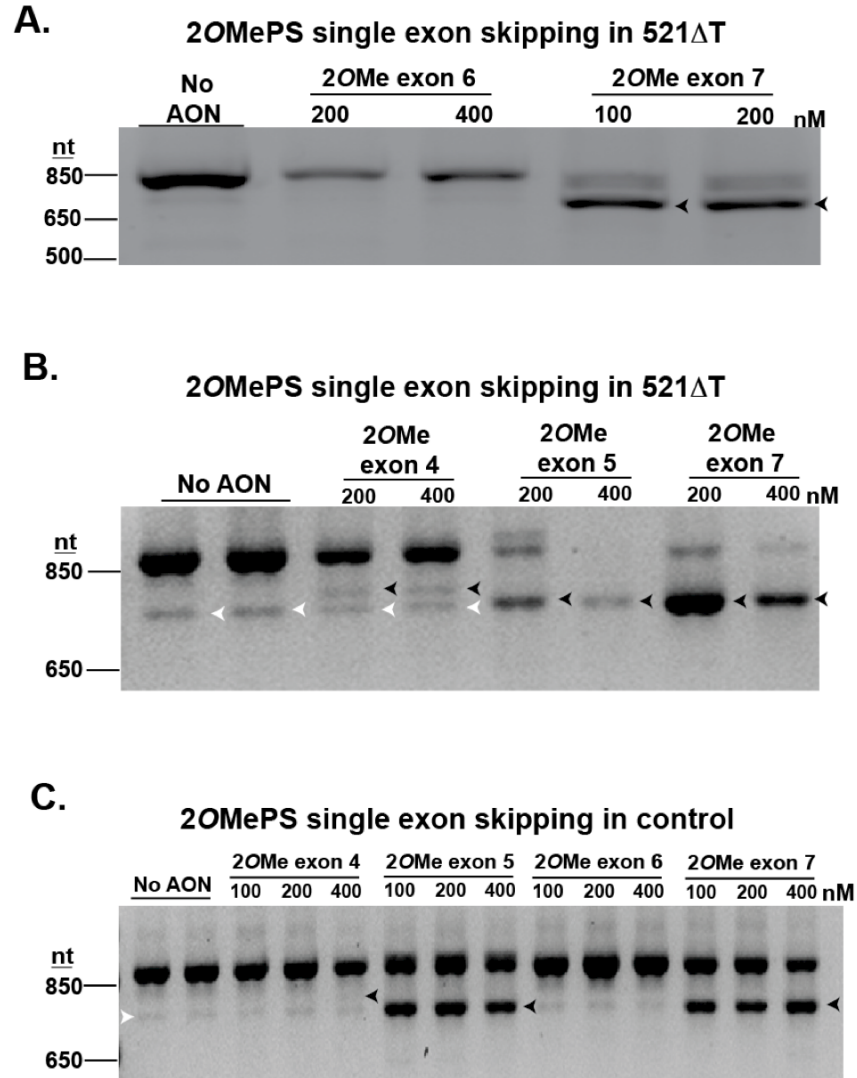

**Supplemental Figure 2. Individual skipping of SGCG exons 4, 5, 6 and 7 with 2OMePS AONs.** Reprogrammed fibroblasts were differentiated and then exposed to single 2OMePS AON treatments targeting individual SGCG exons (differentiation day 9, 36h oligo treatment). **(A/B)** RT-PCR analysis after single 2OMePS AON treatment of reprogrammed 521ΔT cells demonstrated the skipping of individual exons 4, 5 and 7 (black arrowheads). White arrowheads indicate endogenous skipping events. **(C)** RT-PCR analysis after single 2OMePS treatment of reprogrammed control cells demonstrated skipping of exons 5 and 7, with modest skipping of exon 4 (black arrowheads).

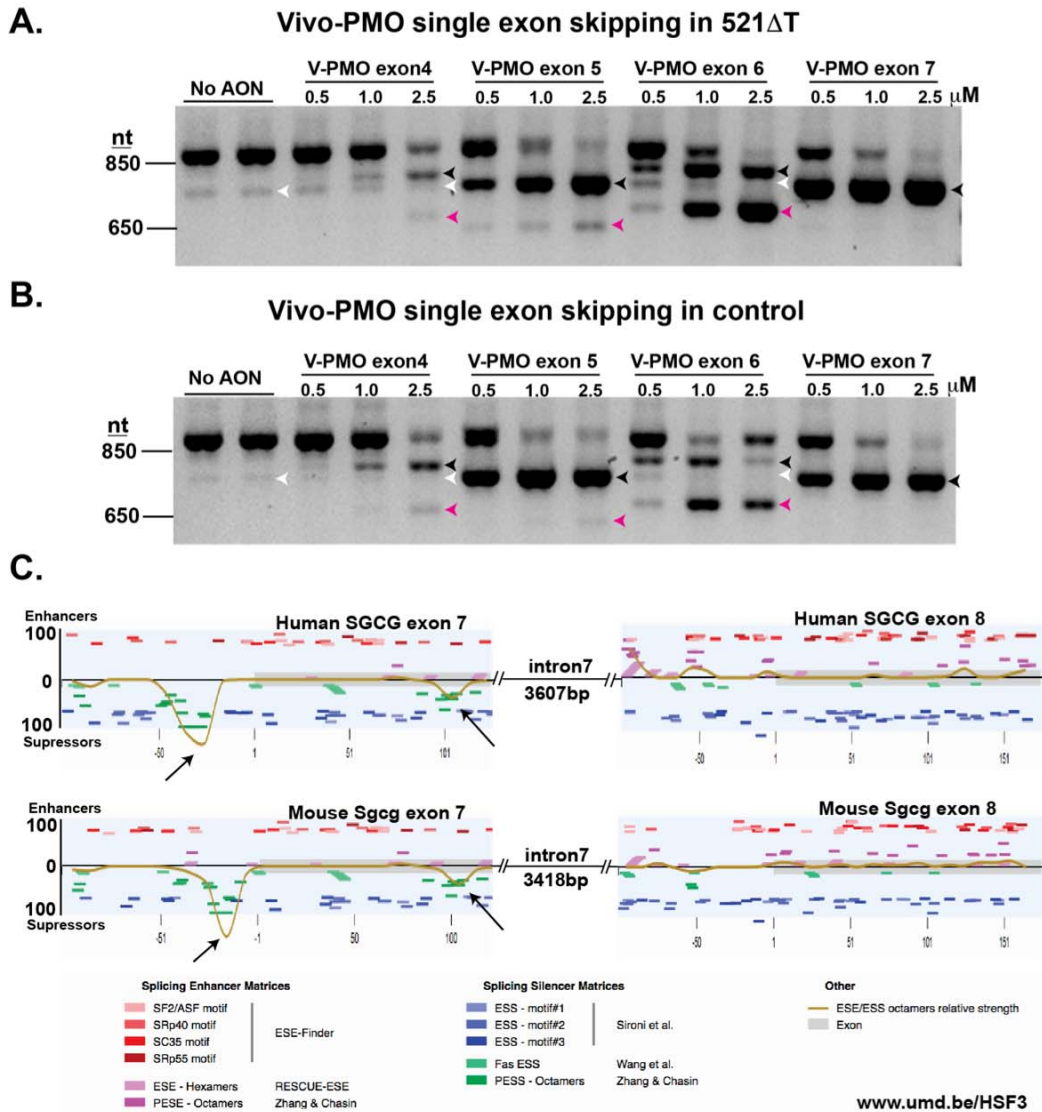

**Supplemental Figure 3. Individual skipping of SGCG exons 4, 5, 6 and 7 with vivo-PMOs.** Myogenic cells exposed to single vivo-PMO treatments targeting individual SGCG exons. **(A/B)** RT-PCR analysis after single vivo-PMO treatment of reprogrammed SGCG 521 $\Delta$ T and control cells demonstrated the dose-dependent skipping of individual exons 4, 5, 6 and 7 (black arrowheads). There was also evidence of double exon skipping with single vivo-PMO treatments targeting exons 4, 5 and 6 (pink arrowheads). Notably, there was no evidence of double skipping with the single exon 7 treatment. White arrowheads indicate endogenous skipping events. **(C)** The human and murine SGCG genes were analyzed for exon splicing elements encoded in exons 7 and 8 along with 100bp of the intronic region upstream of each exon. Splice-site analysis revealed two areas of splice repression in the exon 7 region that were conserved in human and mouse (black arrows).

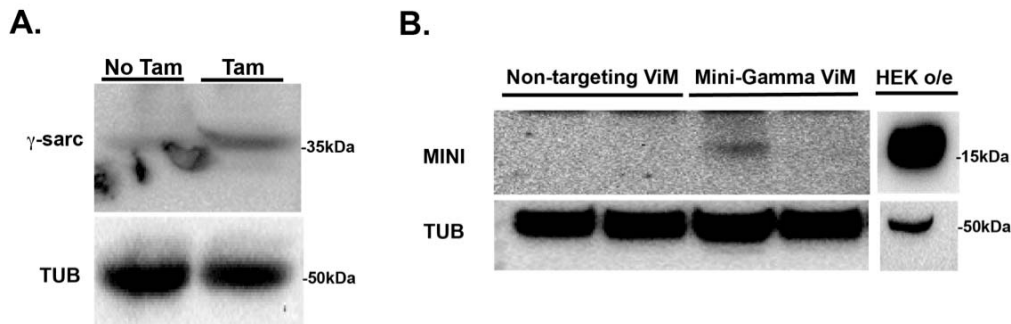

**Supplemental Figure 4. Expression of  $\gamma$ -sarcoglycan and Mini-Gamma protein in reprogrammed fibroblasts.** (A) Control fibroblasts were transduced with the iMyoD virus and, treated with or without tamoxifen (48h, 5 $\mu$ M) followed by culture in differentiation media (12 days). Immunoblot analysis demonstrated expression of  $\gamma$ -sarcoglycan protein ( $\gamma$ -sarc) in the myogenically reprogrammed fibroblasts as compared to the uninduced (no tamoxifen) controls.  $\gamma$ -tubulin (TUB) was used as a loading control. (B) Reprogrammed fibroblasts from the LGMD 2C patient with the *SGCG* ex5/6del frameshift mutation were treated for 3 days with either a non-targeting vivo-PMO or a readframe correcting vivo-PMO cocktail (n=2 culture replicates). Immunoblot analysis detected expression the ~17kDa Mini-Gamma protein in one of two independent experiments. As a control, a construct encoding human Mini-Gamma was overexpressed (o/e) in HEK293T cells. Immunoblotting showed the expression of Mini-Gamma protein at ~17kDa. Note, the band representing the overexpression of Mini-Gamma in HEK293T was imaged at a lower exposure time compared with the bands representing Mini-Gamma protein in samples treated with vivo-PMOs.

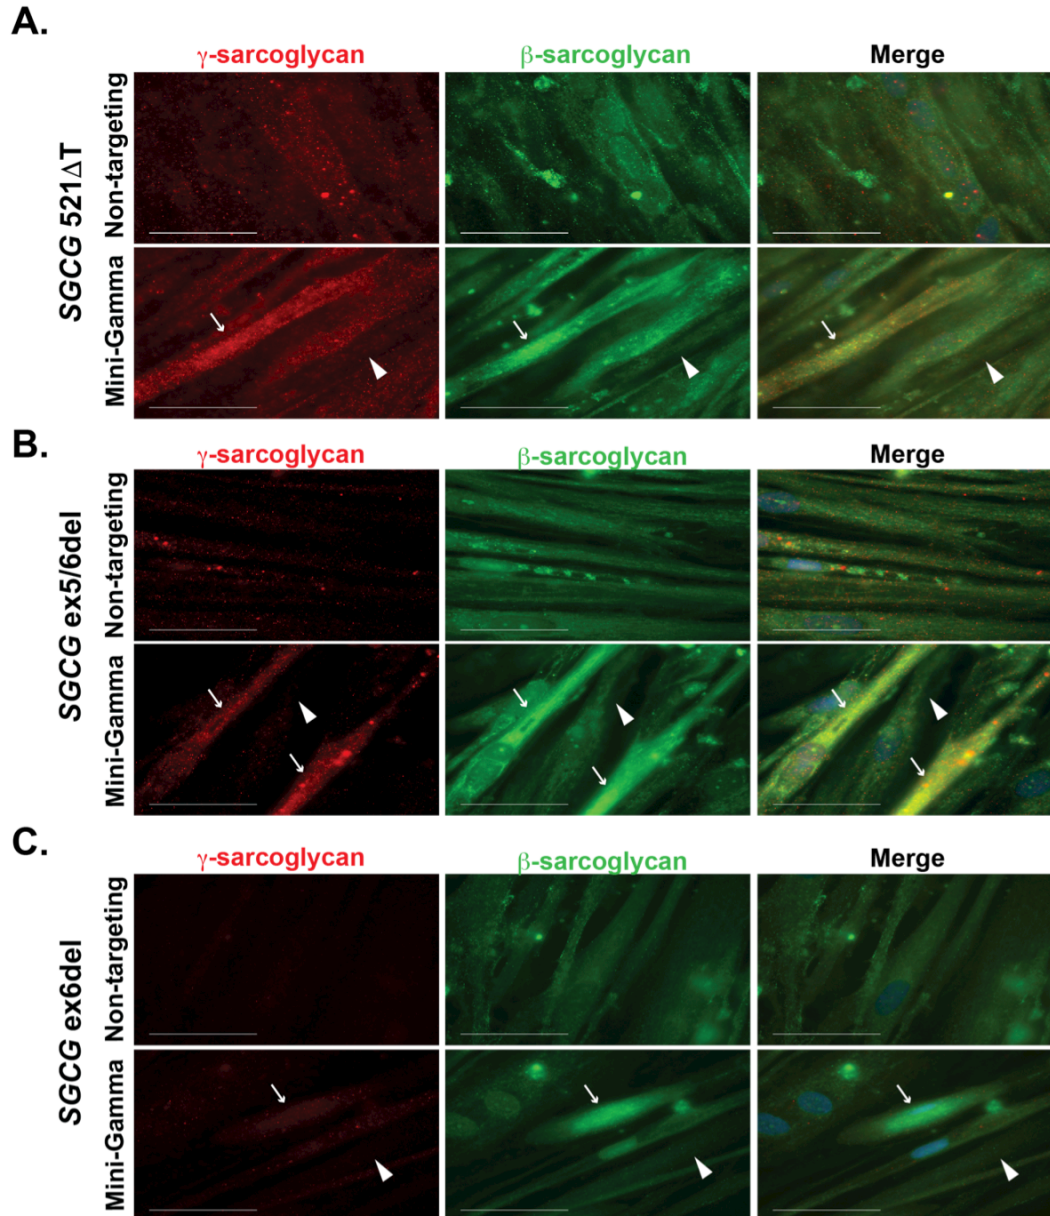

**Supplemental Figure 5.  $\beta$ -sarcoglycan protein expression in myotubes treated with vivo-PMOs.** Shown is IFM of reprogrammed fibroblasts treated for 3 days with a non-targeting vivo-PMO (Non-targeting) or readframe correcting vivo-PMO cocktail (Mini-Gamma). **(A-C)** Mini-Gamma (red) was expressed in a subset of myotubes (white arrows) after treatment with vivo-PMOs that corrected the **(A)** 521 $\Delta$ T; **(B)** e5/6del; and **(C)** e6del mutations. **(A-C)** Those myotubes expressing Mini-Gamma protein (red) also had greater  $\beta$ -sarcoglycan expression (green). White arrows show the same myobutes expressing both  $\gamma$ -sarcoglycan and  $\beta$ -sarcoglycan, and arrowheads show myotubes within the culture expressing less  $\gamma$ -sarcoglycan and  $\beta$ -sarcoglycan. Nuclei are labeled with Hoechst 3342 (blue). Scale bar = 50 $\mu$ M.



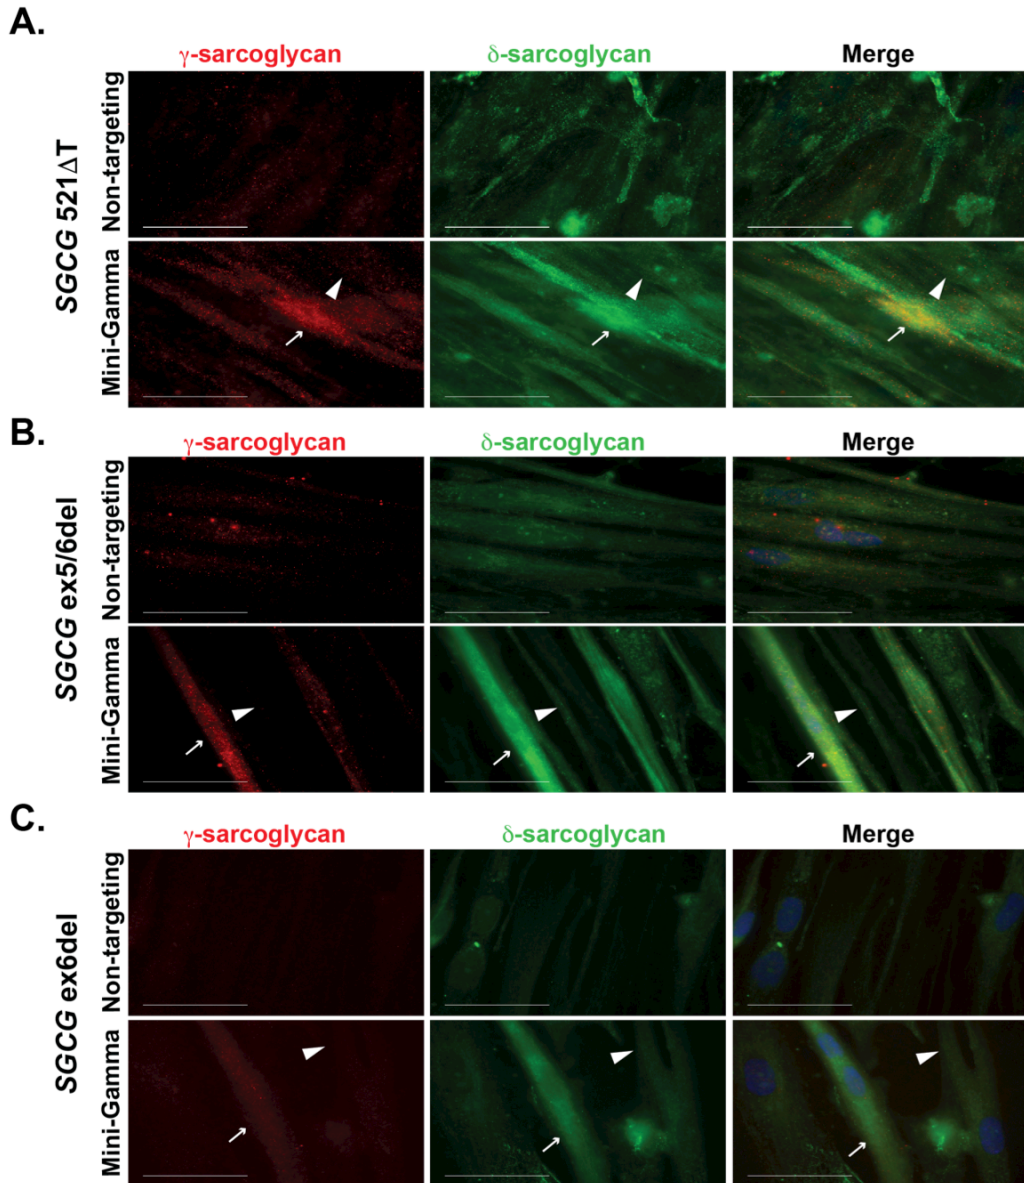

**Supplemental Figure 6.  $\delta$ -sarcoglycan protein expression in myotubes treated with vivo-PMOs.** IFM of reprogrammed fibroblasts treated for 3 days with a non-targeting vivo-PMO (Non-targeting) or readframe correcting vivo-PMO (Mini-Gamma). **(A-C)** Mini-Gamma protein (red) was expressed in a subset of myotubes (white arrows) after treatment with vivo-PMOs that corrected the **(A)** 521 $\Delta$ T; **(B)** e5/6del; and **(C)** e6del mutations. **(A-C)** Those myotubes expressing Mini-Gamma protein (red) also had higher  $\delta$ -sarcoglycan protein expression (green). White arrows show the same myotubes expressing both  $\gamma$ -sarcoglycan and  $\beta$ -sarcoglycan, and arrowheads show myotubes within the culture expressing less  $\gamma$ -sarcoglycan and  $\beta$ -sarcoglycan. Nuclei are labeled with Hoechst 3342 (blue). Scale bar = 50 $\mu$ M.

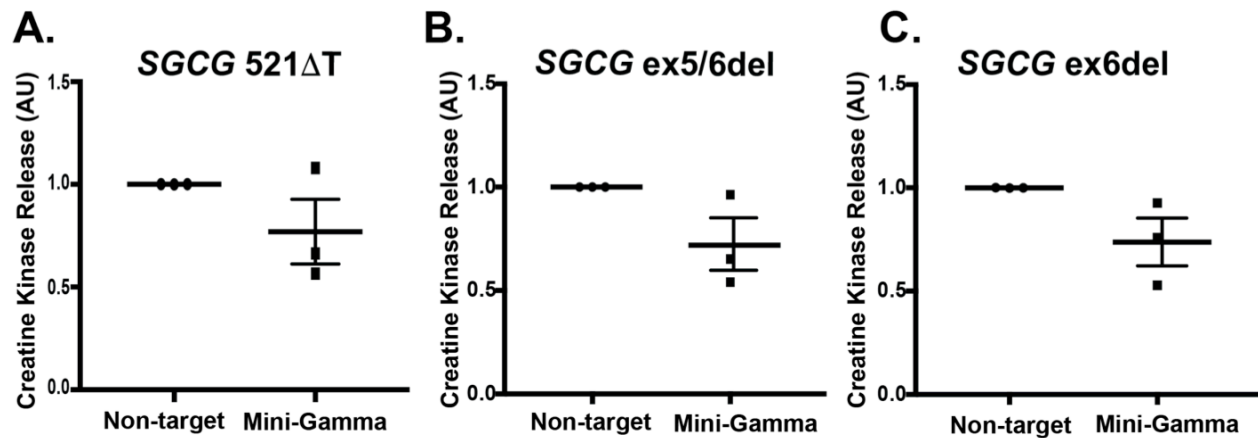

**Supplemental Figure 7. Membrane stability in reprogrammed fibroblasts after vivo-PMO treatment.** To assess membrane stability in response to vivo-PMO treatment, reprogrammed fibroblasts were treated for 3 days with vivo-PMOs as indicated and then challenged with hypo-osmotic shock. Membrane leak was monitored by the release of CK. **(A-C)** Treatment with readframe correcting vivo-PMOs resulted in a trend towards a reduction in CK release in reprogrammed **(A)** 521 $\Delta$ T; **(B)** e5/6del; and **(C)** e6del fibroblasts. Data represent the percent of CK released relative to the total CK from 3 independent experiments ( $n=3-4$ , for each). Data are presented as the mean CK released in cells treated with vivo-PMOs that corrected the reading frame (Mini-Gamma) relative to the mean in cells treated with a non-targeting vivo-PMO (Non-target). Data represent the mean $\pm$ SEM.



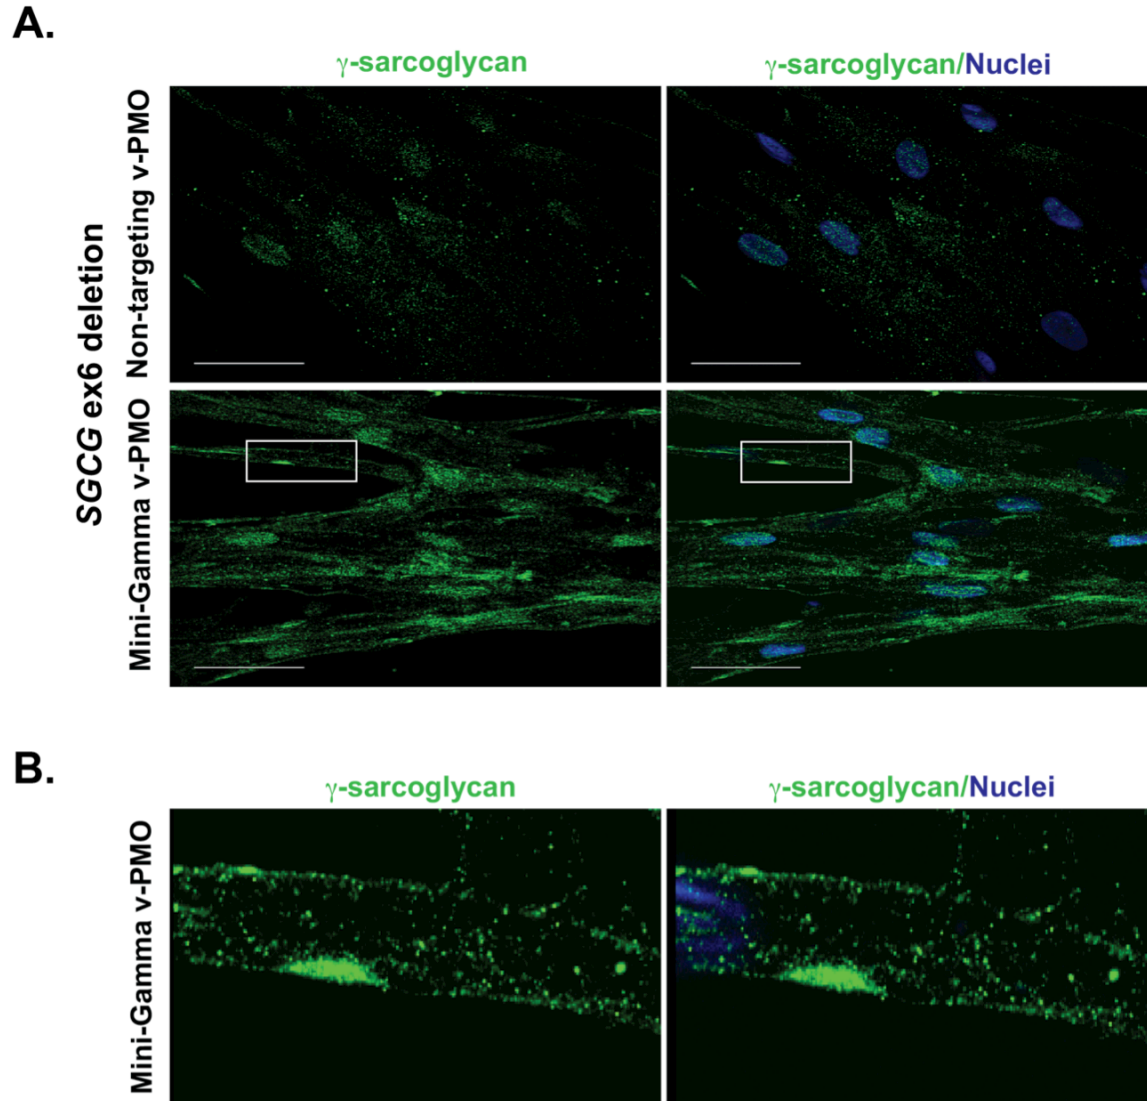

**Supplemental Figure 8. Membrane expression of Mini-Gamma protein in urine-derived cells (UDC).** Shown is IFM of reprogrammed fibroblasts treated for 3 days with a non-targeting vivo-PMO (Non-targeting) or readframe correcting vivo-PMO (Mini-Gamma). **(A)** Treatment with readframe correcting vivo-PMOs successfully generated Mini-Gamma (green). Nuclei were labeled with Hoechst 3342 (blue). Scale bar = 50 $\mu$ M. White boxes indicate regions of interest (ROI). **(B)** The highlighted ROIs indicate localization of Mini-Gamma protein (green) throughout the myotube, including the plasma membrane. The length of the ROI bounding box = 50  $\mu$ M.
